# Supplementary material for: Reversibly Migratable Fluorescent Probe for Precise and Dynamic Evaluation of Cell Mitochondrial Membrane Potentials
Source: MDPI journal article supplement (doi:10.3390/bios12100798), 2022-09-27
Supplement: s1 [file s1]

Supplementary Materials

# Reversibly Migratable Fluorescent Probe for Precise and Dynamic Evaluation of Cell Mitochondrial Membrane Potentials

Guofen Song <sup>1</sup>, Haiwei He <sup>1,2</sup>, Wanling Chen <sup>1</sup>, Yuanliang Lv <sup>1</sup>, Paul K. Chu <sup>3,4,5</sup>, Huaiyu Wang <sup>1,2,\*</sup> and Penghui Li <sup>1,2,\*</sup>

<sup>1</sup> Institute of Biomedicine and Biotechnology, Shenzhen Institute of Advanced Technology, Chinese Academy of Sciences, Shenzhen 518055, China

<sup>2</sup> University of Chinese Academy of Sciences, Beijing 100049, China

<sup>3</sup> Department of Physics, City University of Hong Kong, Tat Chee Avenue, Kowloon, Hong Kong 999077, China

<sup>4</sup> Department of Materials Science and Engineering, City University of Hong Kong, Tat Chee Avenue, Kowloon, Hong Kong 999077, China

<sup>5</sup> Department of Biomedical Engineering, City University of Hong Kong, Tat Chee Avenue, Kowloon, Hong Kong 999077, China

\* Correspondence: hy.wang1@siat.ac.cn (H.W.); ph.li@siat.ac.cn (P.L.); Tel.: +86-755-86392211 (P.L.)

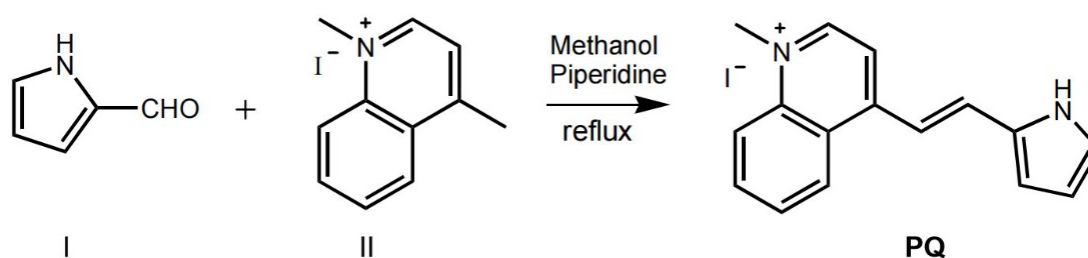

**Scheme S1.** Synthetic route of PQ.

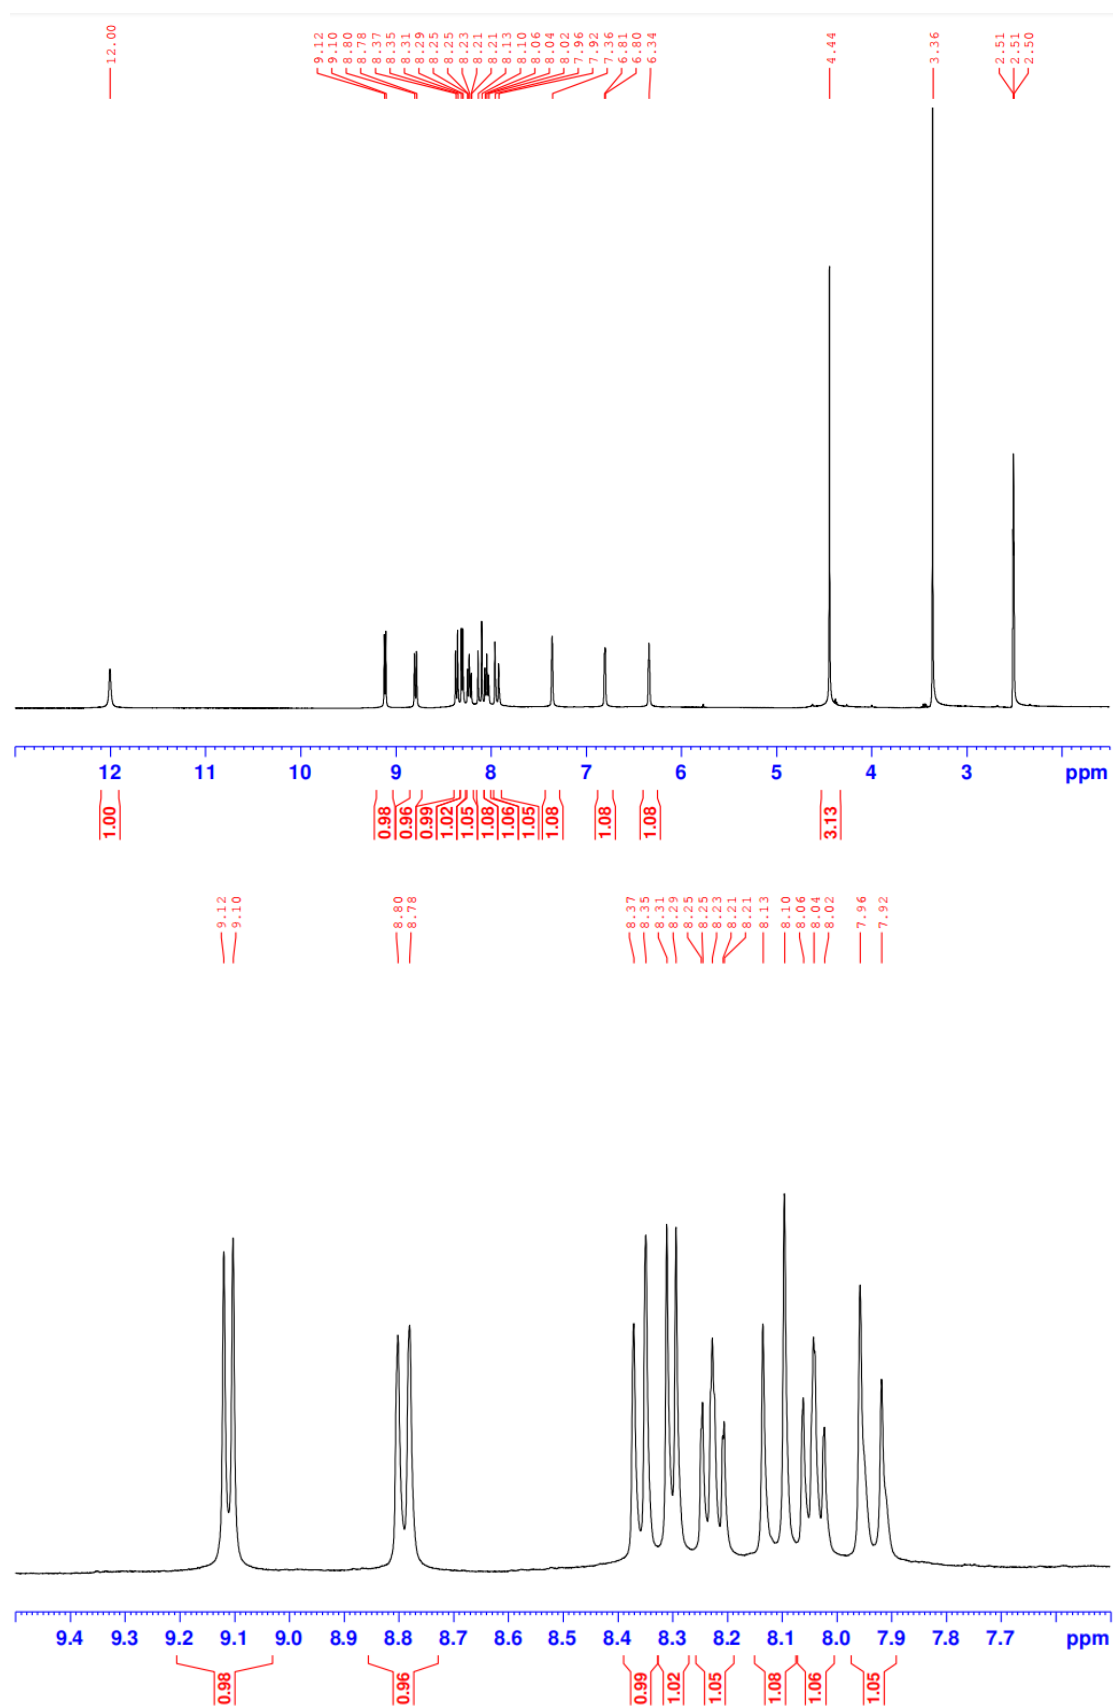Figure S1.  $^1\text{H}$  NMR spectrum of PQ.

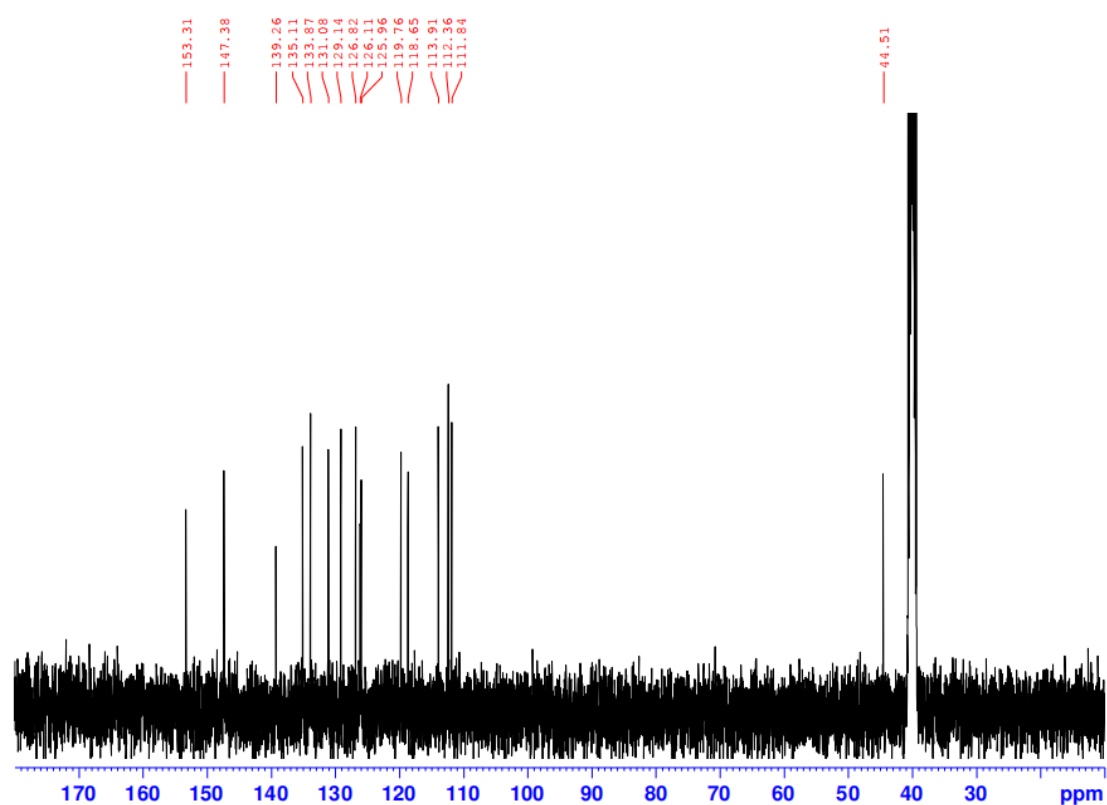

Figure S2.  $^{13}\text{C}$  NMR spectrum of PQ.

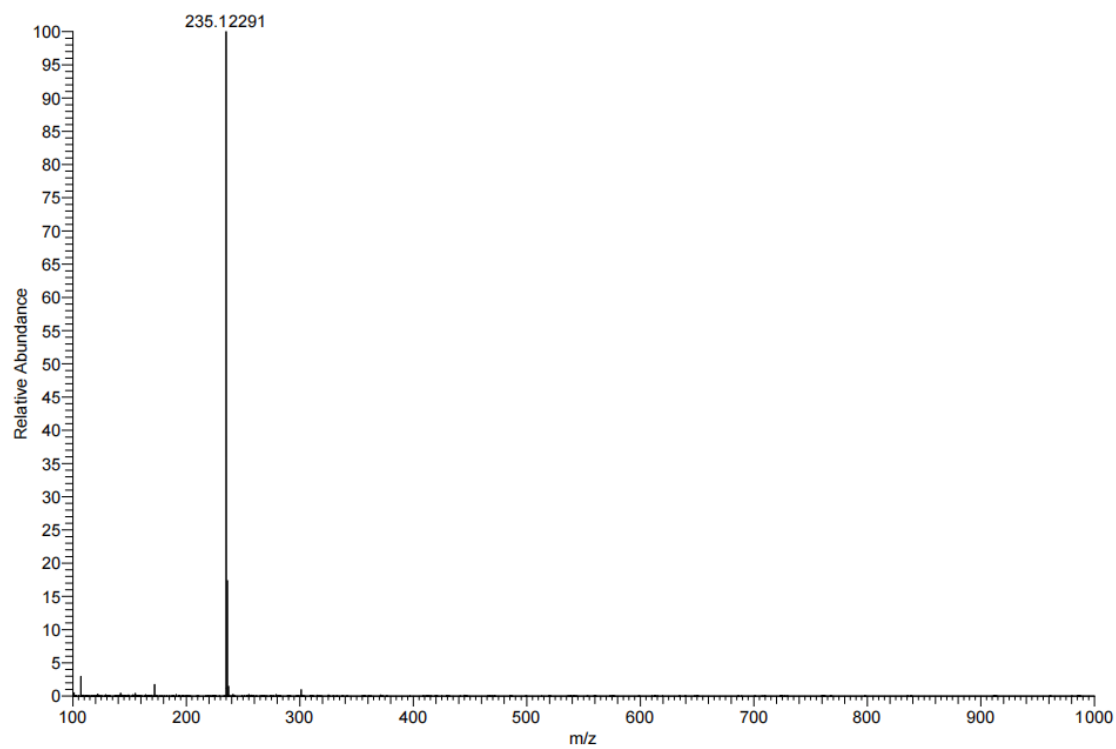

Figure S3. HRMS spectrum of PQ.

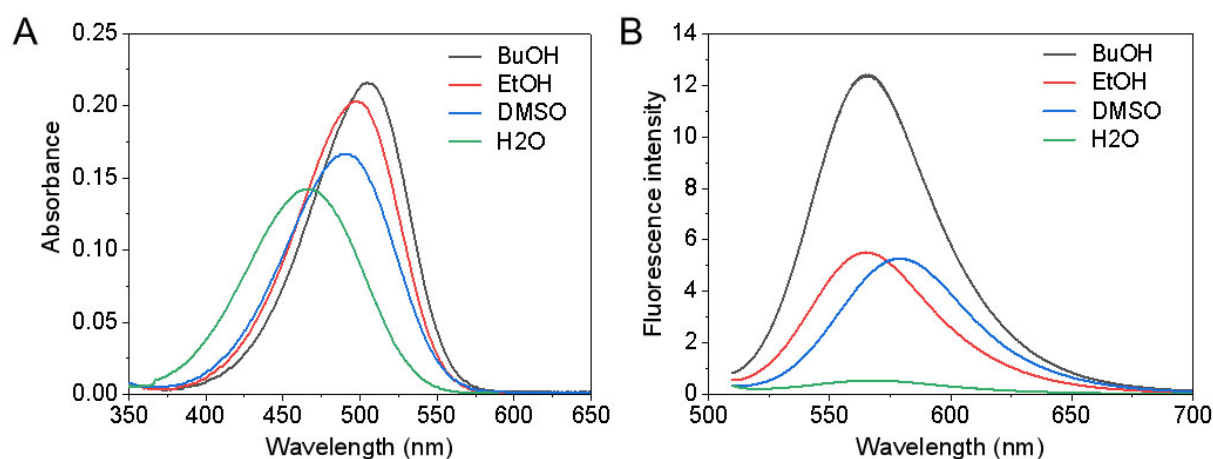

**Figure S4.** UV-vis absorption (A) and fluorescence spectra (B) of 5  $\mu$ M PQ in various solvents with different polarities.

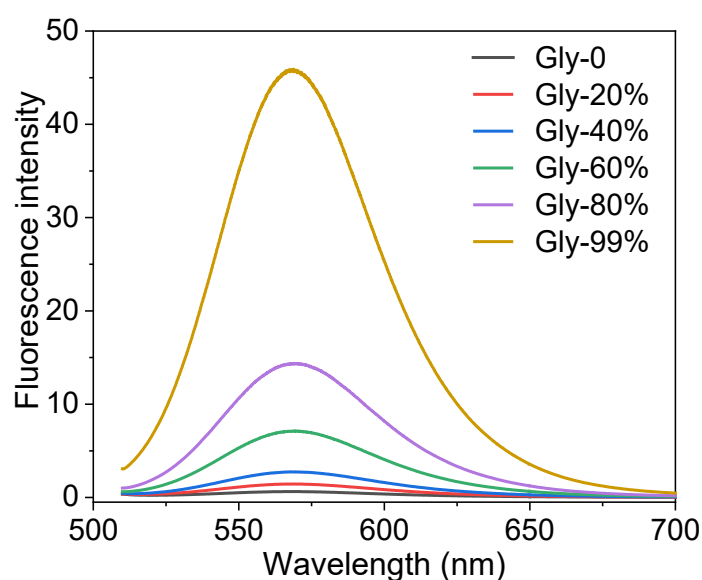

**Figure S5.** Fluorescence spectra of 5  $\mu$ M PQ in H<sub>2</sub>O/glycerol mixtures with various glycerol fractions.

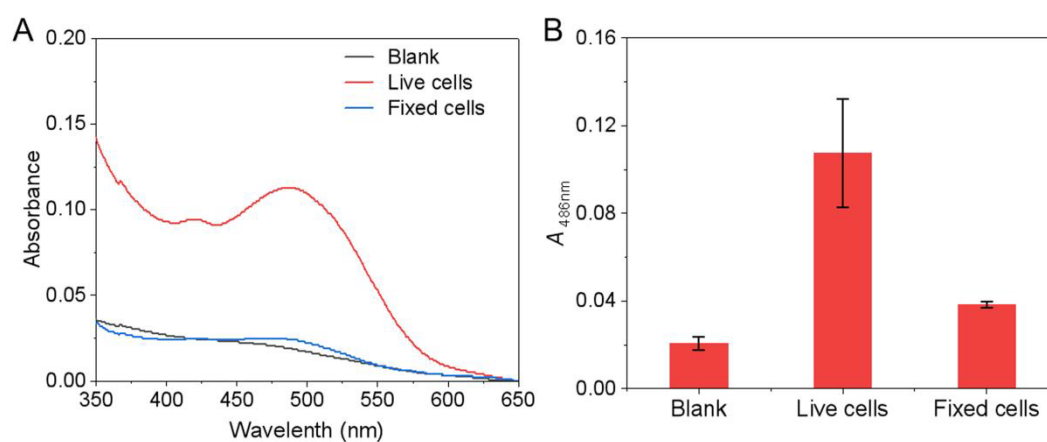

**Figure S6.** The demonstration for PQ translocation. (A) The absorbance spectra of lysates of the mitochondria isolated from cells stained with PQ before and after fixation. (B) Comparison of the absorbance at 486 nm, data represent mean $\pm$ SD (n = 3).

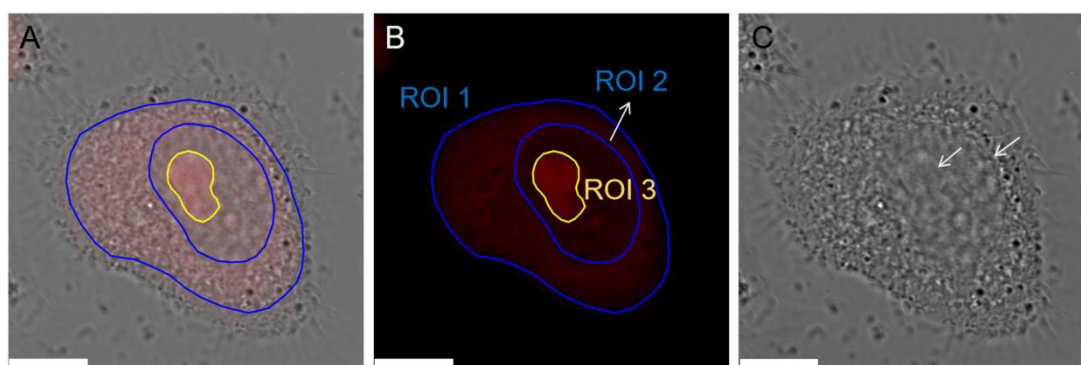

**Figure S7.** CLSM images of HeLa cells stained by 10  $\mu\text{M}$  PQ after treatment of 100  $\mu\text{M}$  CCCP for 10 min. (A) Merge of Fluorescent and bright field images; (B) Fluorescent image; (C) Bright field image.  $\lambda_{\text{ex}}$ : 488 nm,  $\lambda_{\text{em}}$ : 550–650 nm, scale bar: 10  $\mu\text{m}$ . The cell membrane, nucleus and nucleolus were distinct. And the whole cell inside the cell membrane, the nuclear and the nucleolus were sketched by the big blue circle (ROI 1), the small blue circle (ROI 2) and the yellow circle (ROI 3) individually.

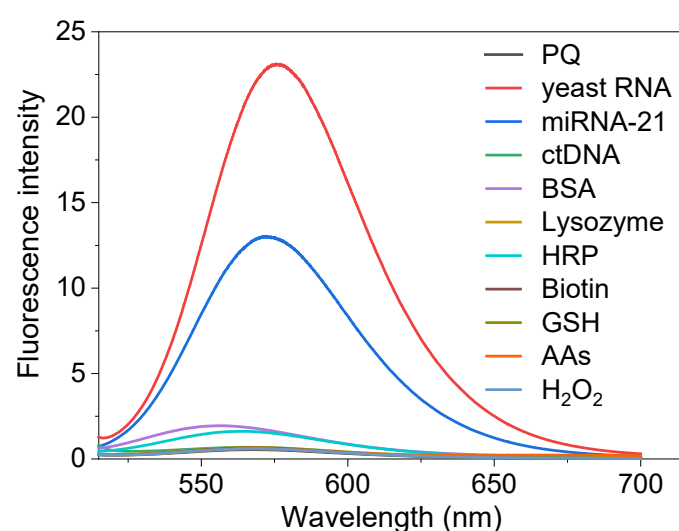

**Figure S8.** Fluorescence spectra of 5  $\mu\text{M}$  PQ in the presence of *yeast* RNA, miRNA-21, *ctDNA*, proteins, biotin, GSH, amino acids and  $\text{H}_2\text{O}_2$  in PBS. The proteins include BSA, Lyso and HRP. The amino acids (AAs) include Hcy, Cys, Gly, Ala, Nor, Glu, His, Iso, Leu, Met, Phe, Pro, Ser, Thr, Try, and Tyr.

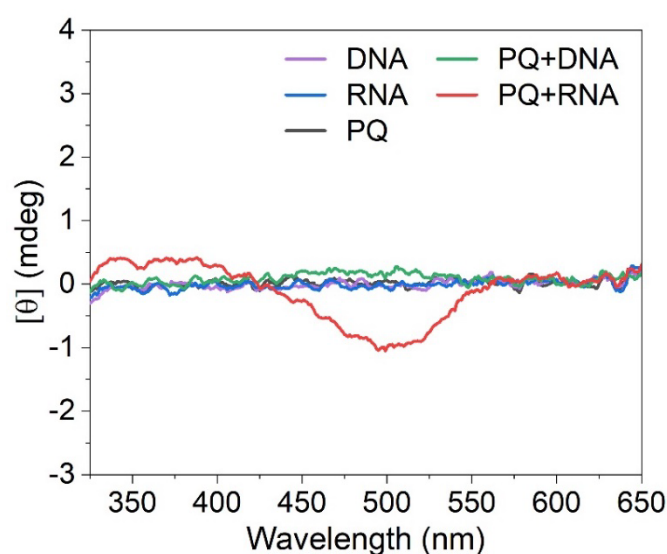

**Figure S9.** CD spectra of 20  $\mu\text{M}$  PQ with or without DNA/RNA (0.5mg/mL) in PBS.

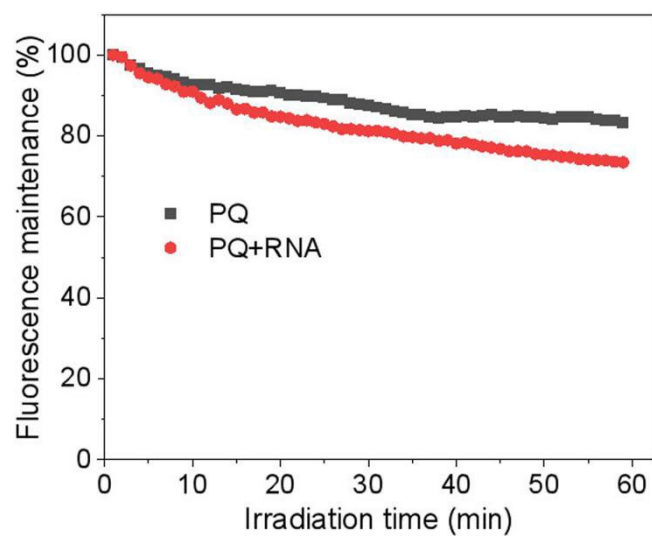

**Figure S10.** The fluorescence stability of 5  $\mu\text{M}$  PQ in solution in absence and presence of RNA with light irradiation time.  $\lambda_{\text{ex}} = 480$  nm, excitation slit: 10,  $\lambda_{\text{em}} = 575$  nm.

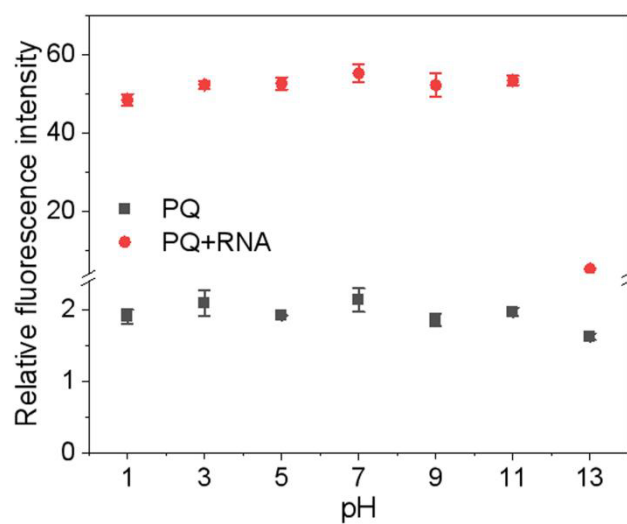

**Figure S11.** The fluorescence intensity changes of PQ (5  $\mu\text{M}$ ) at 575 nm in absence and presence of RNA under various pH. .

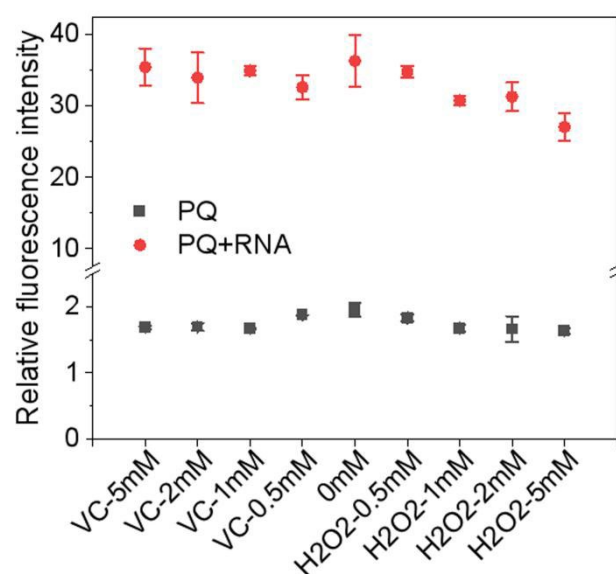

**Figure S12.** The fluorescence intensity changes of PQ (5  $\mu$ M) at 575 nm in presence of oxidizing agent (0.5–5 mM  $\text{H}_2\text{O}_2$ ) and reducing agent (0.5–5 mM VC).

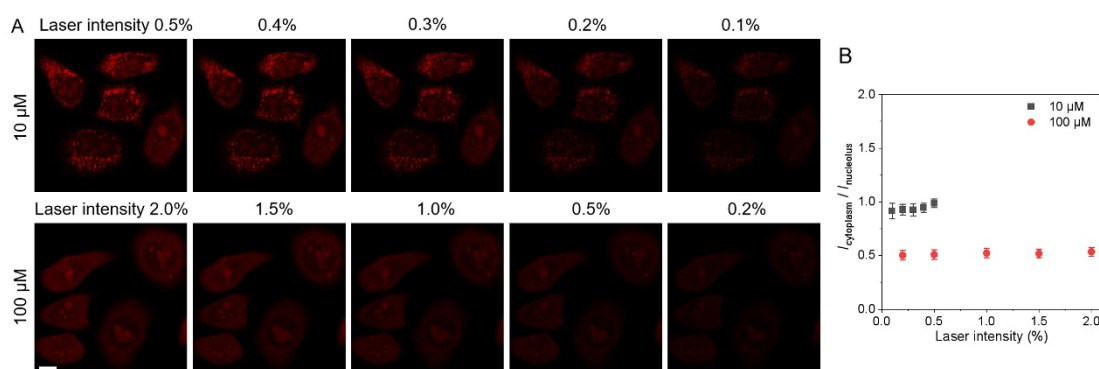

**Figure S13.** Resistance to imaging parameters. (A) The CLSM images of PQ-stained live HeLa cells after treatment of 10  $\mu$ M and 100  $\mu$ M CCCP excited by a series of laser intensities (0.1%–2.0%). The images of cells in 10  $\mu$ M CCCP were obtained excited by laser intensities 0.1%–0.5% because the fluorescence was saturated under laser intensity  $\geq 0.6\%$ . (B) Corresponding  $I_{\text{cytoplasm}} / I_{\text{nucleolus}}$ , data represent mean  $\pm$  SD ( $n = 5$ ).

**Table S1.** The photophysical properties of PQ.

| Solvent           | $\lambda_{\text{Ab}}$ /nm | $\lambda_{\text{em}}$ /nm | Stokes shift /nm | $\epsilon$ / $\text{M}^{-1} \cdot \text{cm}^{-1}$ | $\Phi_{\text{FL}}$ /% |
|-------------------|---------------------------|---------------------------|------------------|---------------------------------------------------|-----------------------|
| n-BuOH            | 505                       | 566                       | 61               | $4.3 \times 10^4$                                 | 2.2                   |
| EtOH              | 498                       | 565                       | 67               | $4.1 \times 10^4$                                 | 0.88                  |
| DMSO              | 490                       | 579                       | 89               | $3.3 \times 10^4$                                 | 1.1                   |
| Water             | 465                       | 567                       | 102              | $2.8 \times 10^4$                                 | 0.13                  |
| +RNA <sup>a</sup> | 504                       | 576                       | 72               | $2.7 \times 10^4$                                 | 5.6                   |
| +DNA <sup>a</sup> | 463                       | 567                       | 104              | $3.4 \times 10^4$                                 | 0.14                  |
| Glycerol          | 494                       | 569                       | 75               | $2.8 \times 10^4$                                 | 12                    |

$\lambda_{\text{Ab}}$  and  $\lambda_{\text{em}}$  are the linear absorption and fluorescent maximum peaks, respectively,  $\epsilon$  is molar absorptivity, and  $\Phi_{\text{FL}}$  is fluorescence quantum yield using fluorescein ( $\Phi = 0.95$ ) as the standard.

<sup>a</sup> The value of DNA phosphate/compound and RNA phosphate/compound is 200.
